# Supplementary material for: A novel class of interpenetrated 3-D network of a dimeric cupric-tetracarboxylate unit
Source: Royal Society of Chemistry journal article supplement (doi:10.1039/b110015g), 2002-01-01
Supplement: b110015g.doc [file b110015g.doc]

# 
